# Supplementary material
Source: PubMed Central journal article supplement (PMC8458514)
Supplement: NIHMS1722150-supplement-fS1-S5.pdf [file NIHMS1722150-supplement-fS1-S5.pdf]

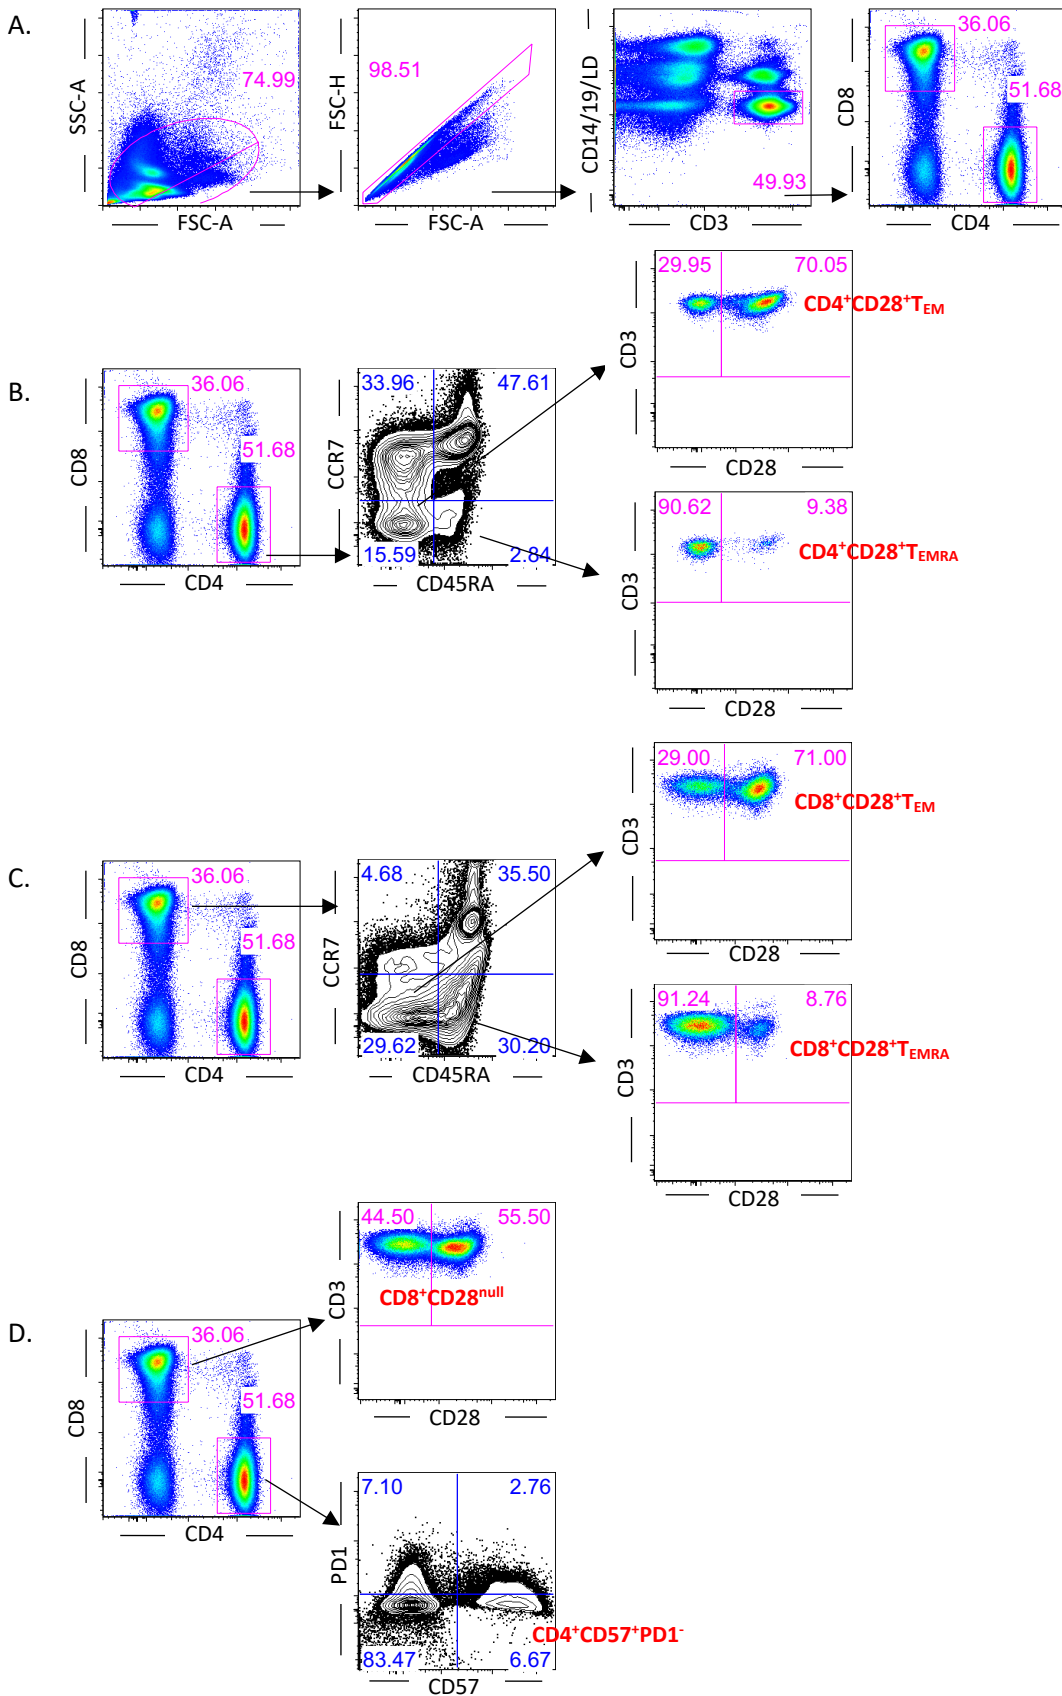

**Supplemental Figure 1. Gating strategy to identify “risky” memory T cell subsets associated with belatacept-resistant rejection.** Representative flow plots of the gating strategy to identify (A) CD4<sup>+</sup> and CD8<sup>+</sup> T cells, (B) CD4<sup>+</sup> CD28<sup>+</sup> T<sub>EM</sub> and CD4<sup>+</sup> CD28<sup>+</sup> T<sub>EMRA</sub> subsets, (C) CD8<sup>+</sup> CD28<sup>+</sup> T<sub>EM</sub> and CD8<sup>+</sup> CD28<sup>+</sup> T<sub>EMRA</sub> subsets, (D) CD8<sup>+</sup> CD28<sup>null</sup> and CD4<sup>+</sup> CD57<sup>+</sup> PD1<sup>-</sup> subsets.

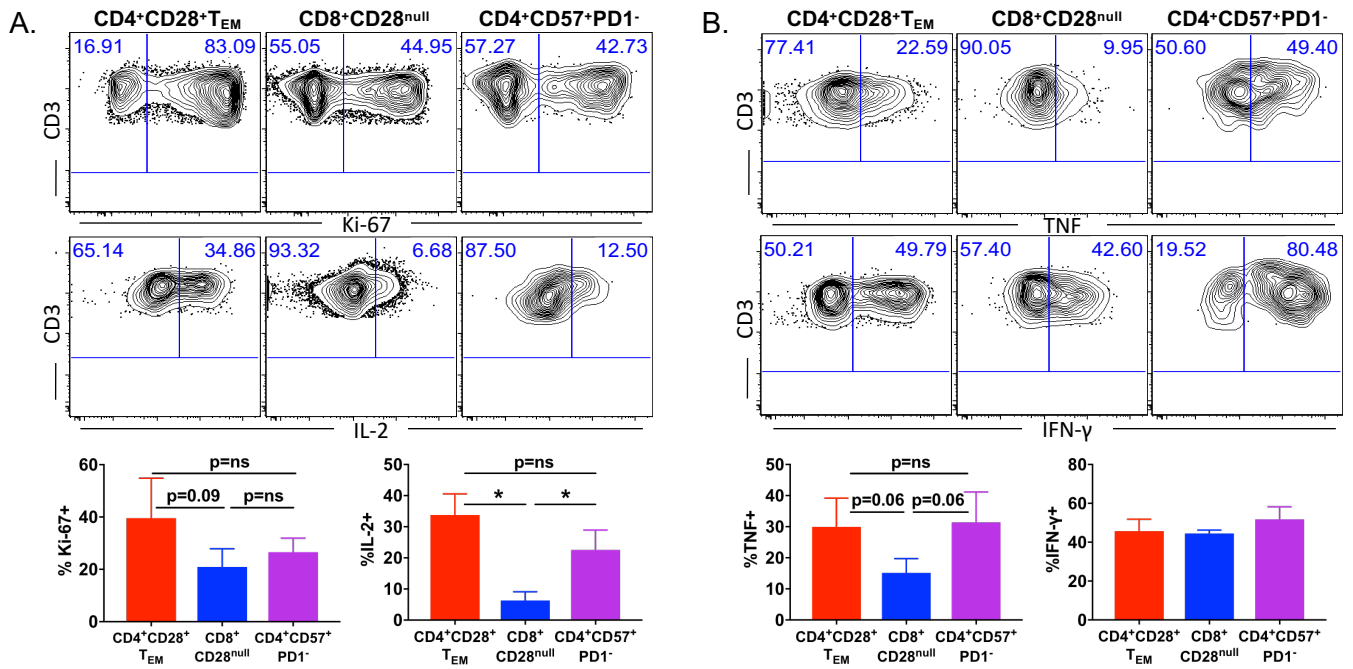

**Supplemental Figure 2. Characterization of “risky” memory T cell subsets associated with belatacept-resistant rejection.** Human PBMCs from healthy donors were stimulated ex vivo with anti-CD3/CD28 beads for 3 d followed by brief restimulation in the presence or absence of PMA/Iono. Risky memory T cell subsets were defined as in Figure 1. (A) Representative flow plots and summary data of frequencies of Ki-67<sup>+</sup> proliferating cells and IL-2-secreting cells within risky memory T cell subsets after stimulation. (B) Representative flow plots and summary data of frequencies of TNF-producing cells and IFN- $\gamma$ -producing cells within risky memory T cell subsets after stimulation (\*, p < 0.05; n = 6 per experiment; data are representative of three independent experiments).

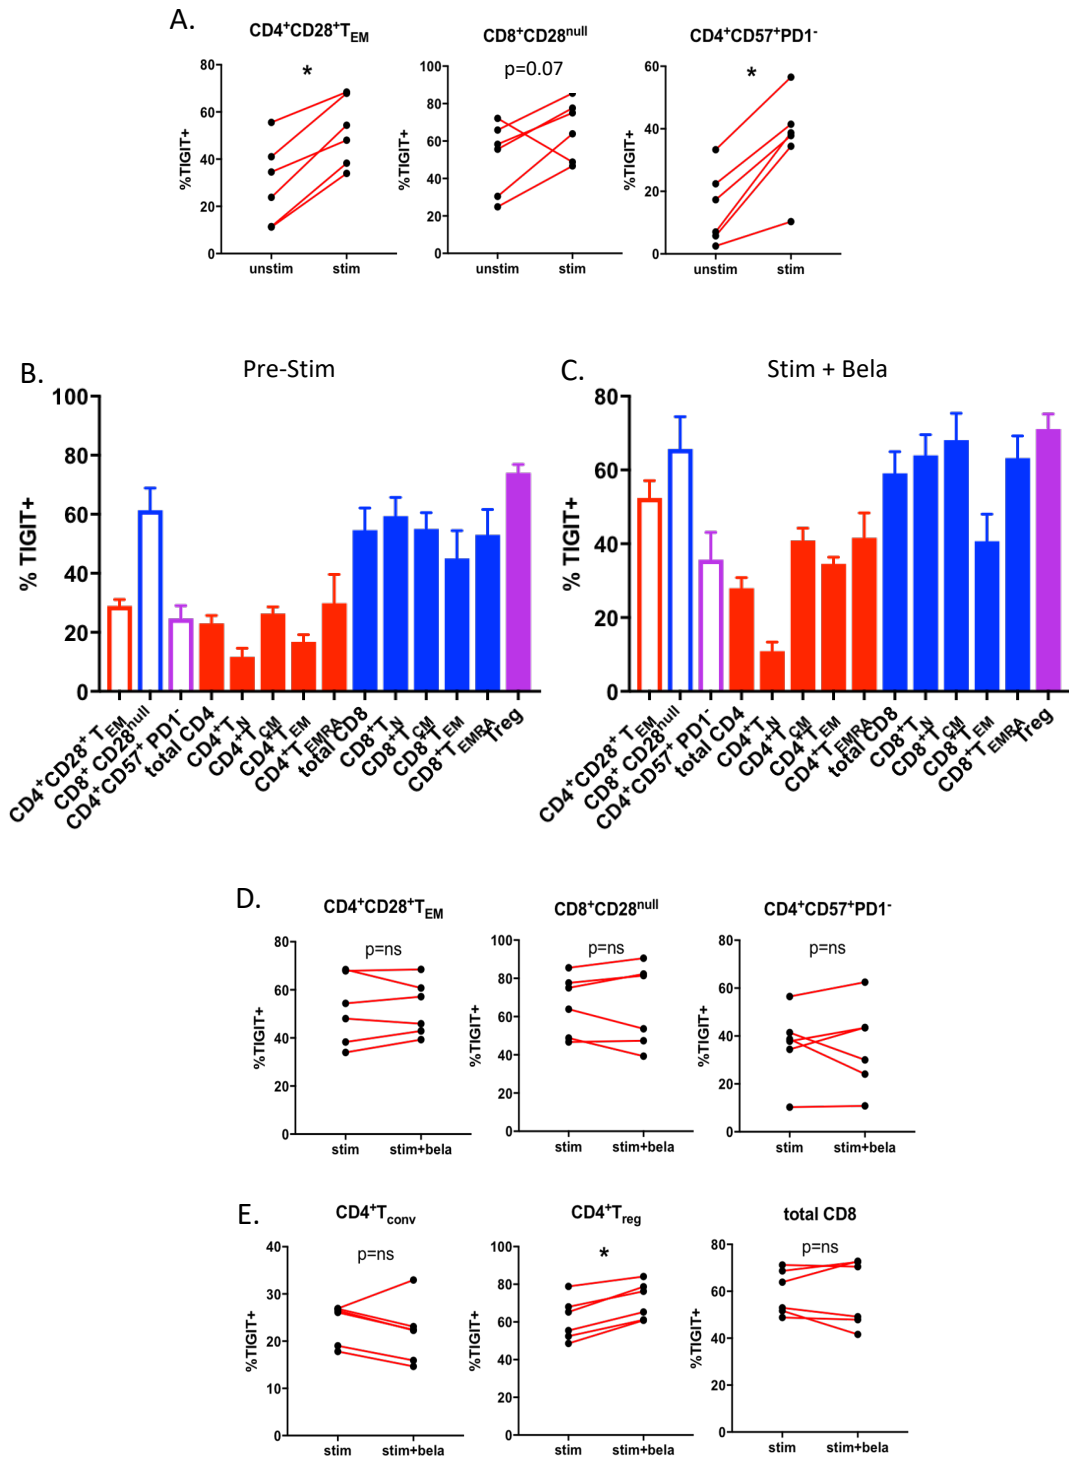

**Supplemental Figure 3. TIGIT expression is increased following ex vivo restimulation but not further increased by exposure to belatacept.** Peripheral blood T cells from healthy donors were left unstimulated or were stimulated ex vivo using anti-CD3/CD28 beads in the presence or absence of belatacept. TIGIT expression on the different memory T cell subsets in the various conditions is shown (\*,  $p < 0.05$ ;  $n = 6$  per experiment; data are representative of three independent experiments).

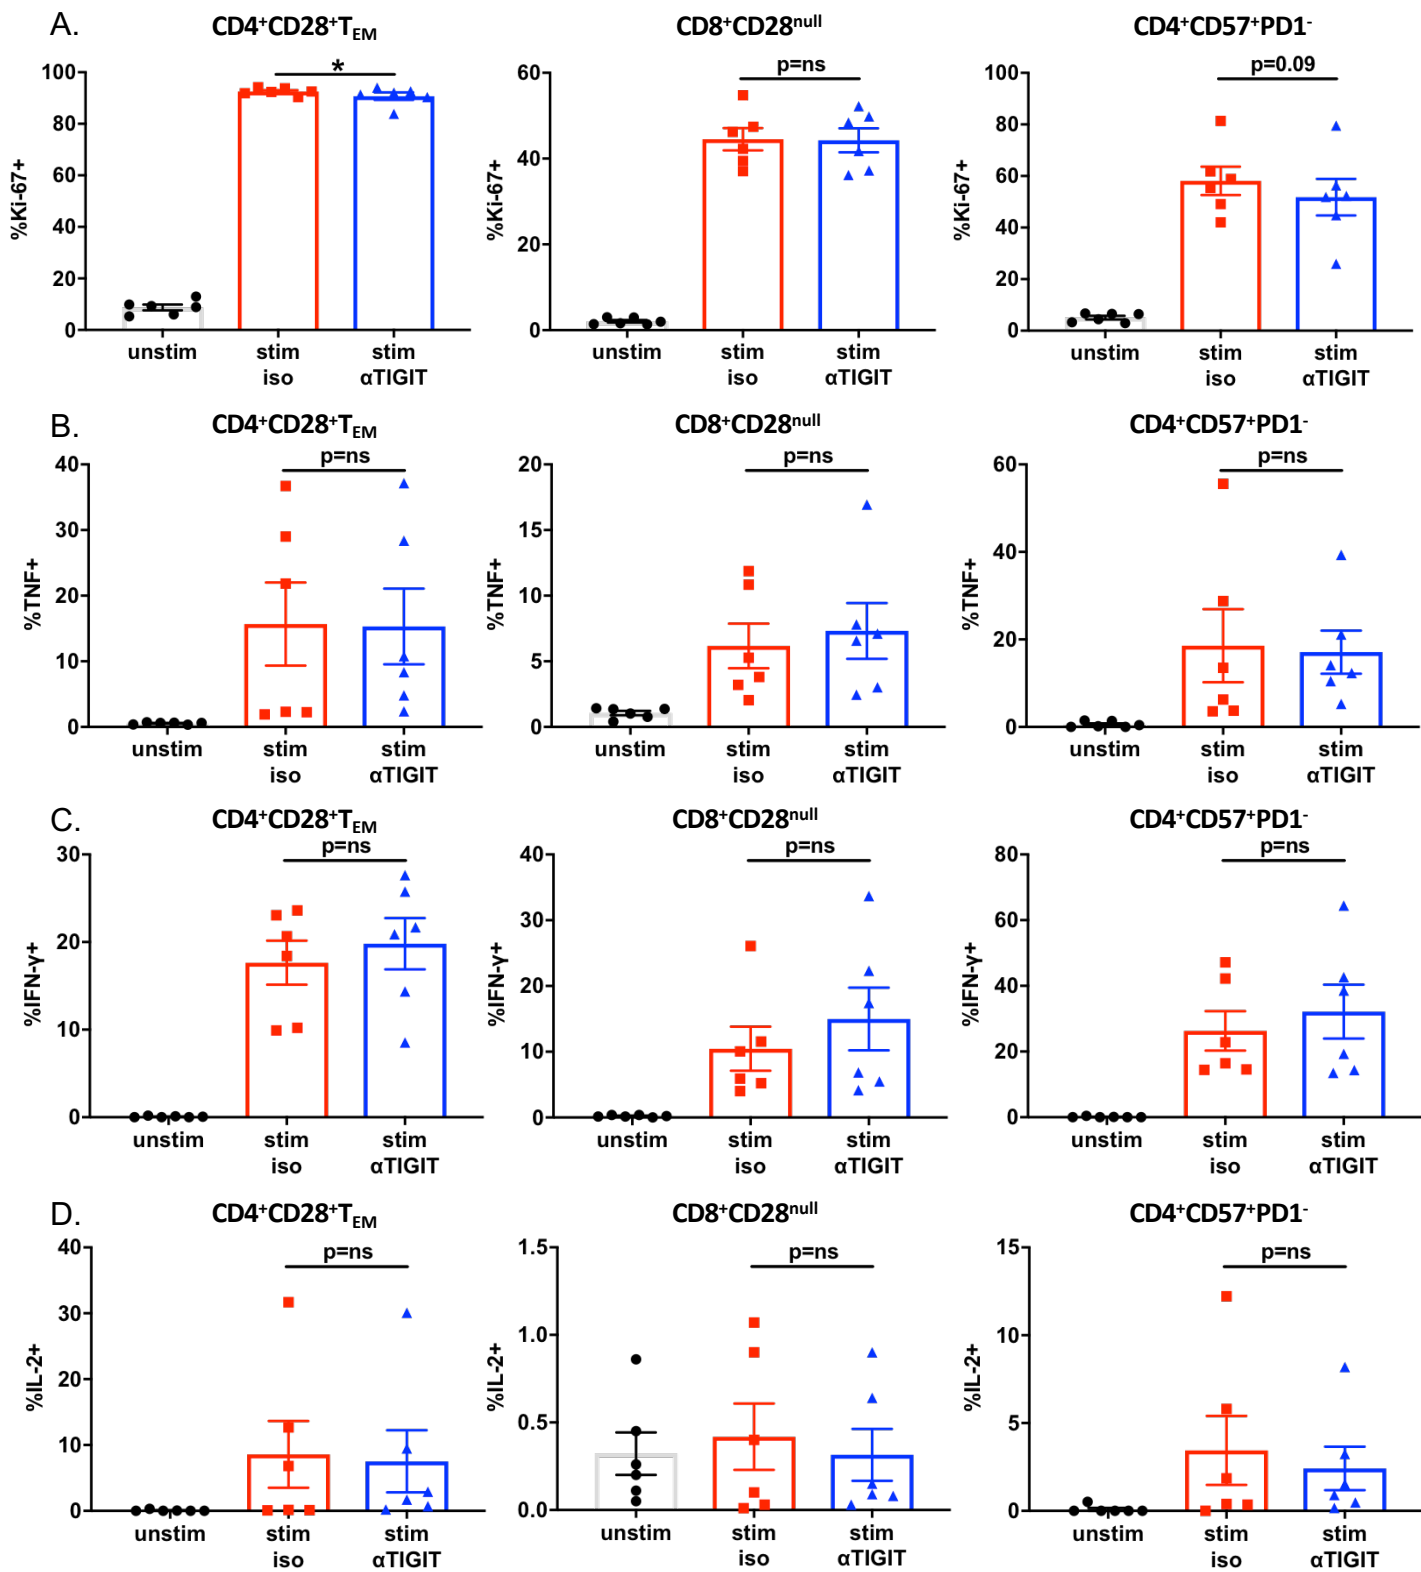

**Supplemental Figure 4. Agonistic  $\alpha$ TIGIT does not differentially affect the proliferation and cytokine effector function of “risky” memory T cell subsets.** Peripheral blood T cells from healthy donors were left unstimulated or were stimulated ex vivo in the presence of agonistic  $\alpha$ TIGIT or isotype control. Risky memory T cell subsets were defined as in Figure 1. Summary data of frequencies of Ki-67<sup>+</sup> proliferating cells (A), TNF-secreting cells (B), IFN- $\gamma$ -secreting cells (C) and IL-2-secreting cells (D) within risky memory T cell subsets (\*,  $p < 0.05$ ;  $n = 6$  per experiment; data are representative of three independent experiments).

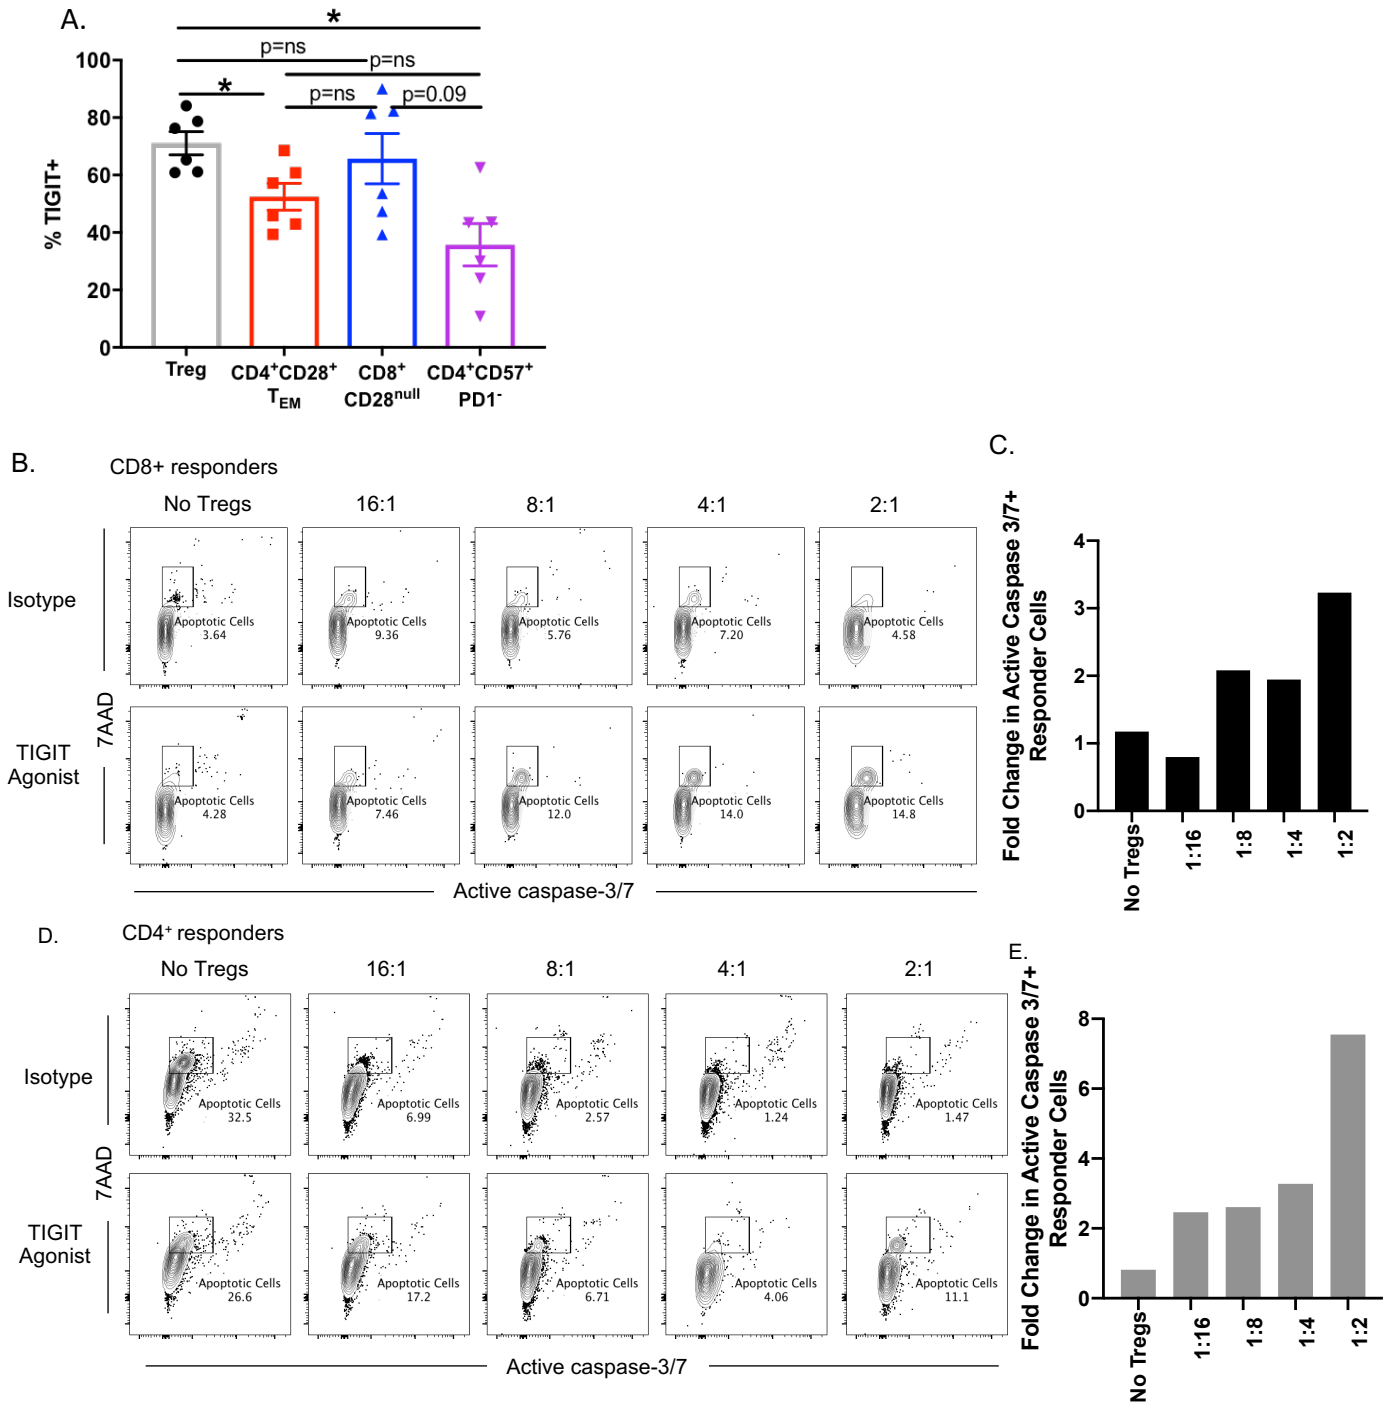

**Supplemental Figure 5. TIGIT agonism induces apoptosis of CD4<sup>+</sup> and CD8<sup>+</sup> T cells in a Treg-dependent manner.** A, Frequencies of TIGIT<sup>+</sup> cells among FOXP3<sup>+</sup> Treg and memory T cell subsets. B, Human Tregs were purified from PBMC using CD4<sup>+</sup> negative selection followed by CD25<sup>+</sup> positive selection and were cultured in the presence of increasing numbers of conventional CD8<sup>+</sup> (B, C) or CD4<sup>+</sup> (D, E) T cells in presence of either the agonistic anti-TIGIT antibody or an isotype control. Cultures were stimulated with anti-CD3/anti-CD28 DynaBeads, and active caspase-3/7<sup>+</sup> cells were enumerated via flow cytometry at d5. The fold change in caspase3/7<sup>+</sup> in T cells from TIGIT agonist-treated cultures vs. isotype-treated wells is depicted (C, E).
